# Supplementary material for: Molecular Detection of Mycobacterium tuberculosis from Stools in Young Children by Use of a Novel Centrifugation-Free Processing Method
Source: PubMed Central journal article supplement (PMC6113478; doi:10.1128/jcm.00781-18), 2018-08-27
Supplement: zjm999096098s1.pdf [file zjm999096098s1.pdf]

Figure S1a. Flow diagram showing stool 1 specimens (1 stool per participant) finally included in the Xpert-06 analysis

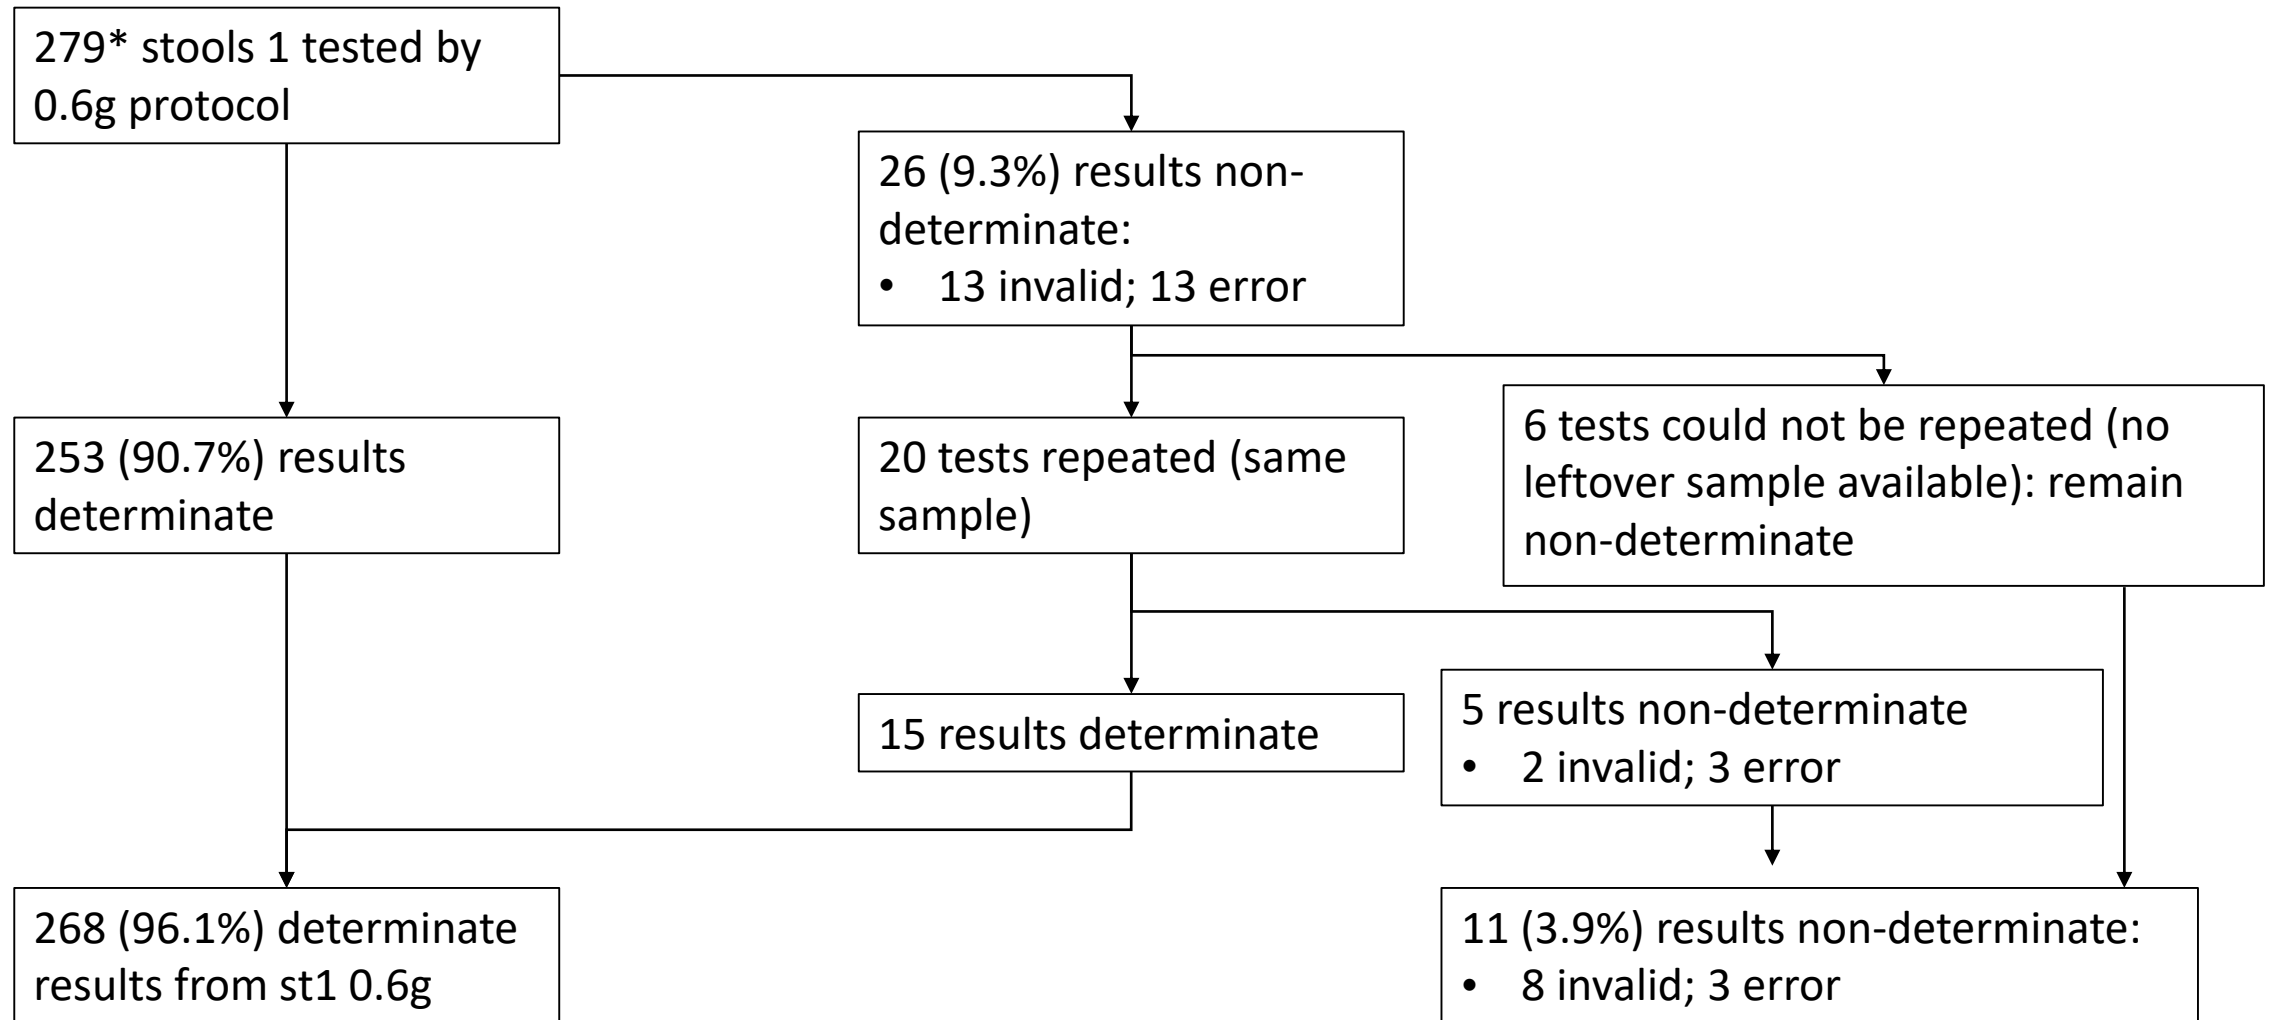

\*Stool from one child was only tested by swab

Figure S1b. Flow diagram showing stool 1 specimens (1 stool per participant) finally included in the Xpert-S analysis

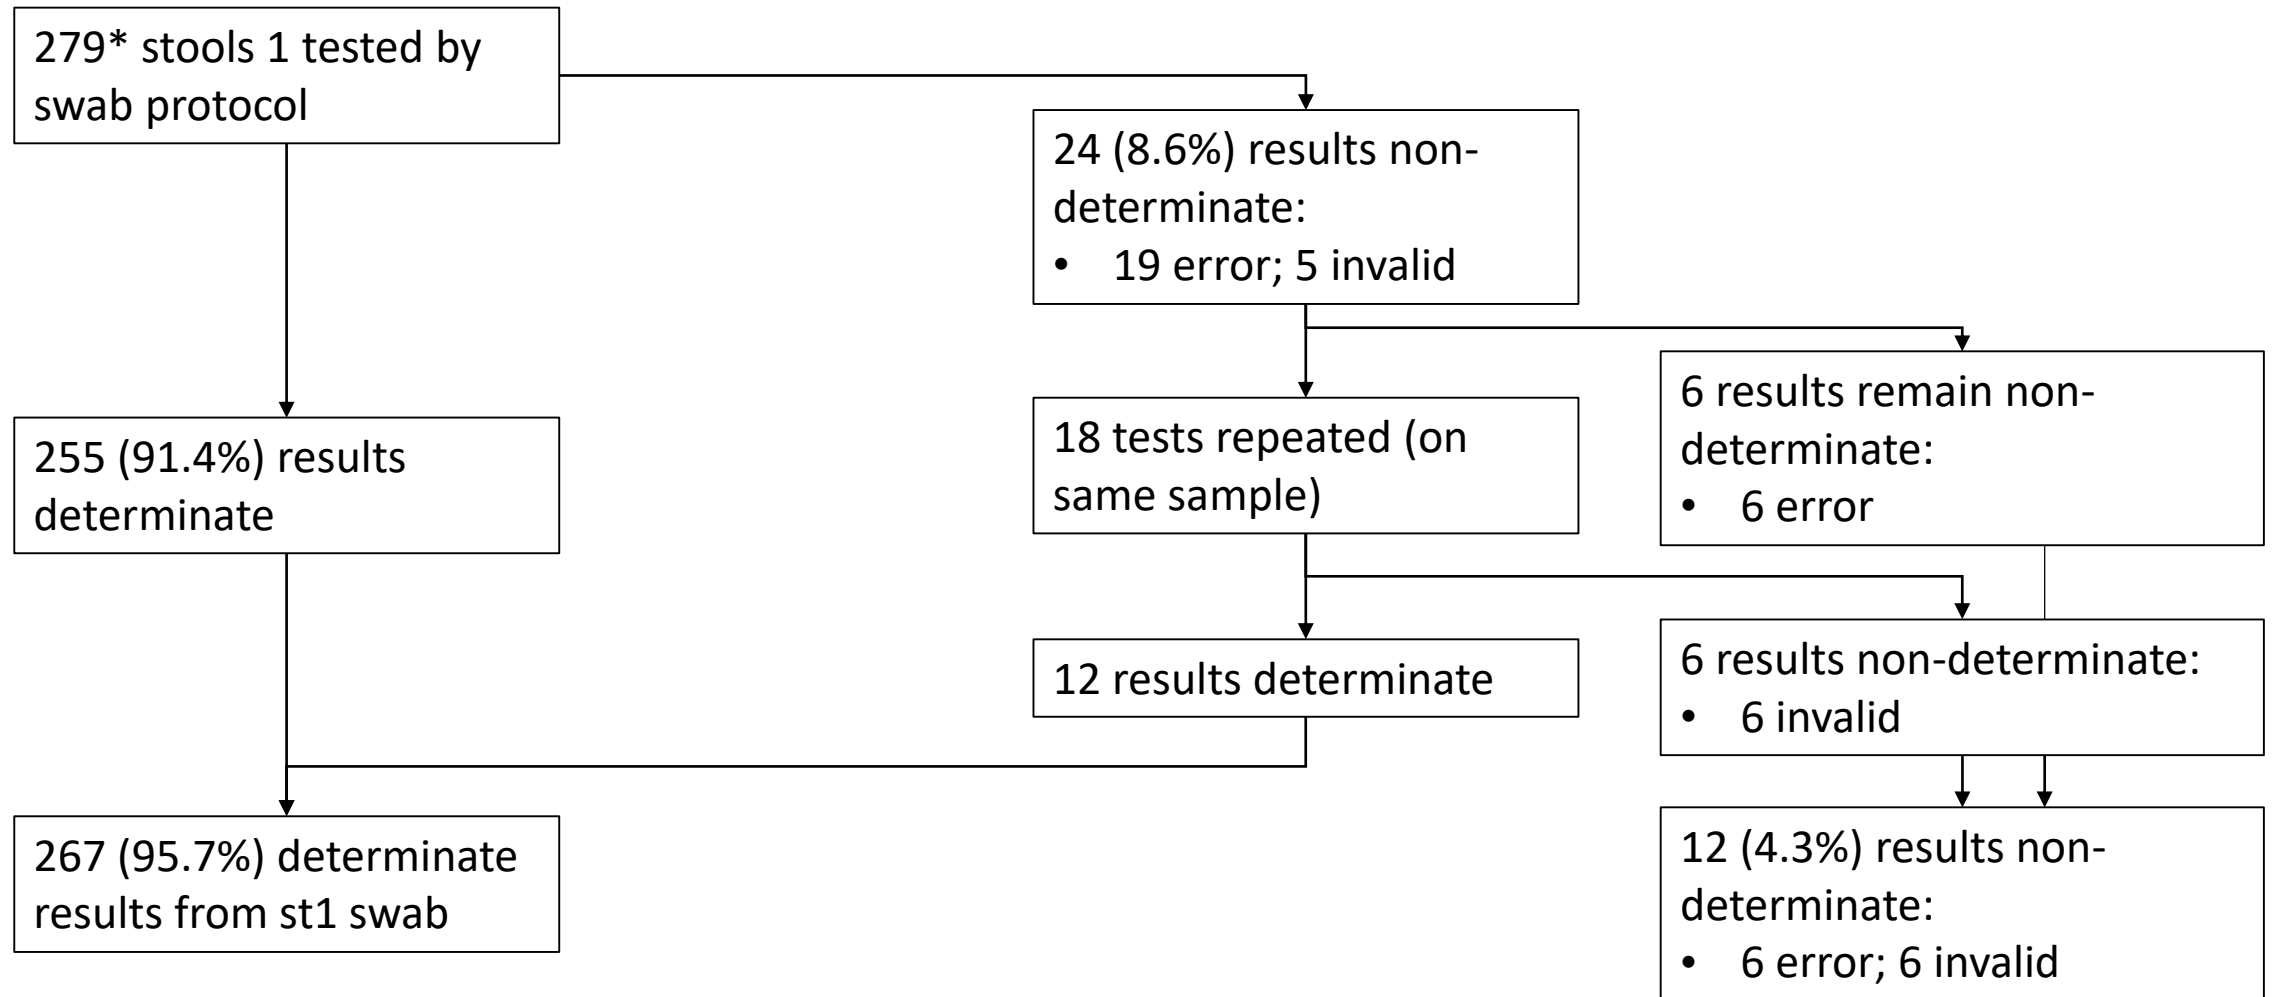

\*Stool from one child was only tested by 0.6g protocol

Figure S2a. Flow diagram showing stool 2 specimens (1 stool per participant) finally included in the Xpert-06 analysis

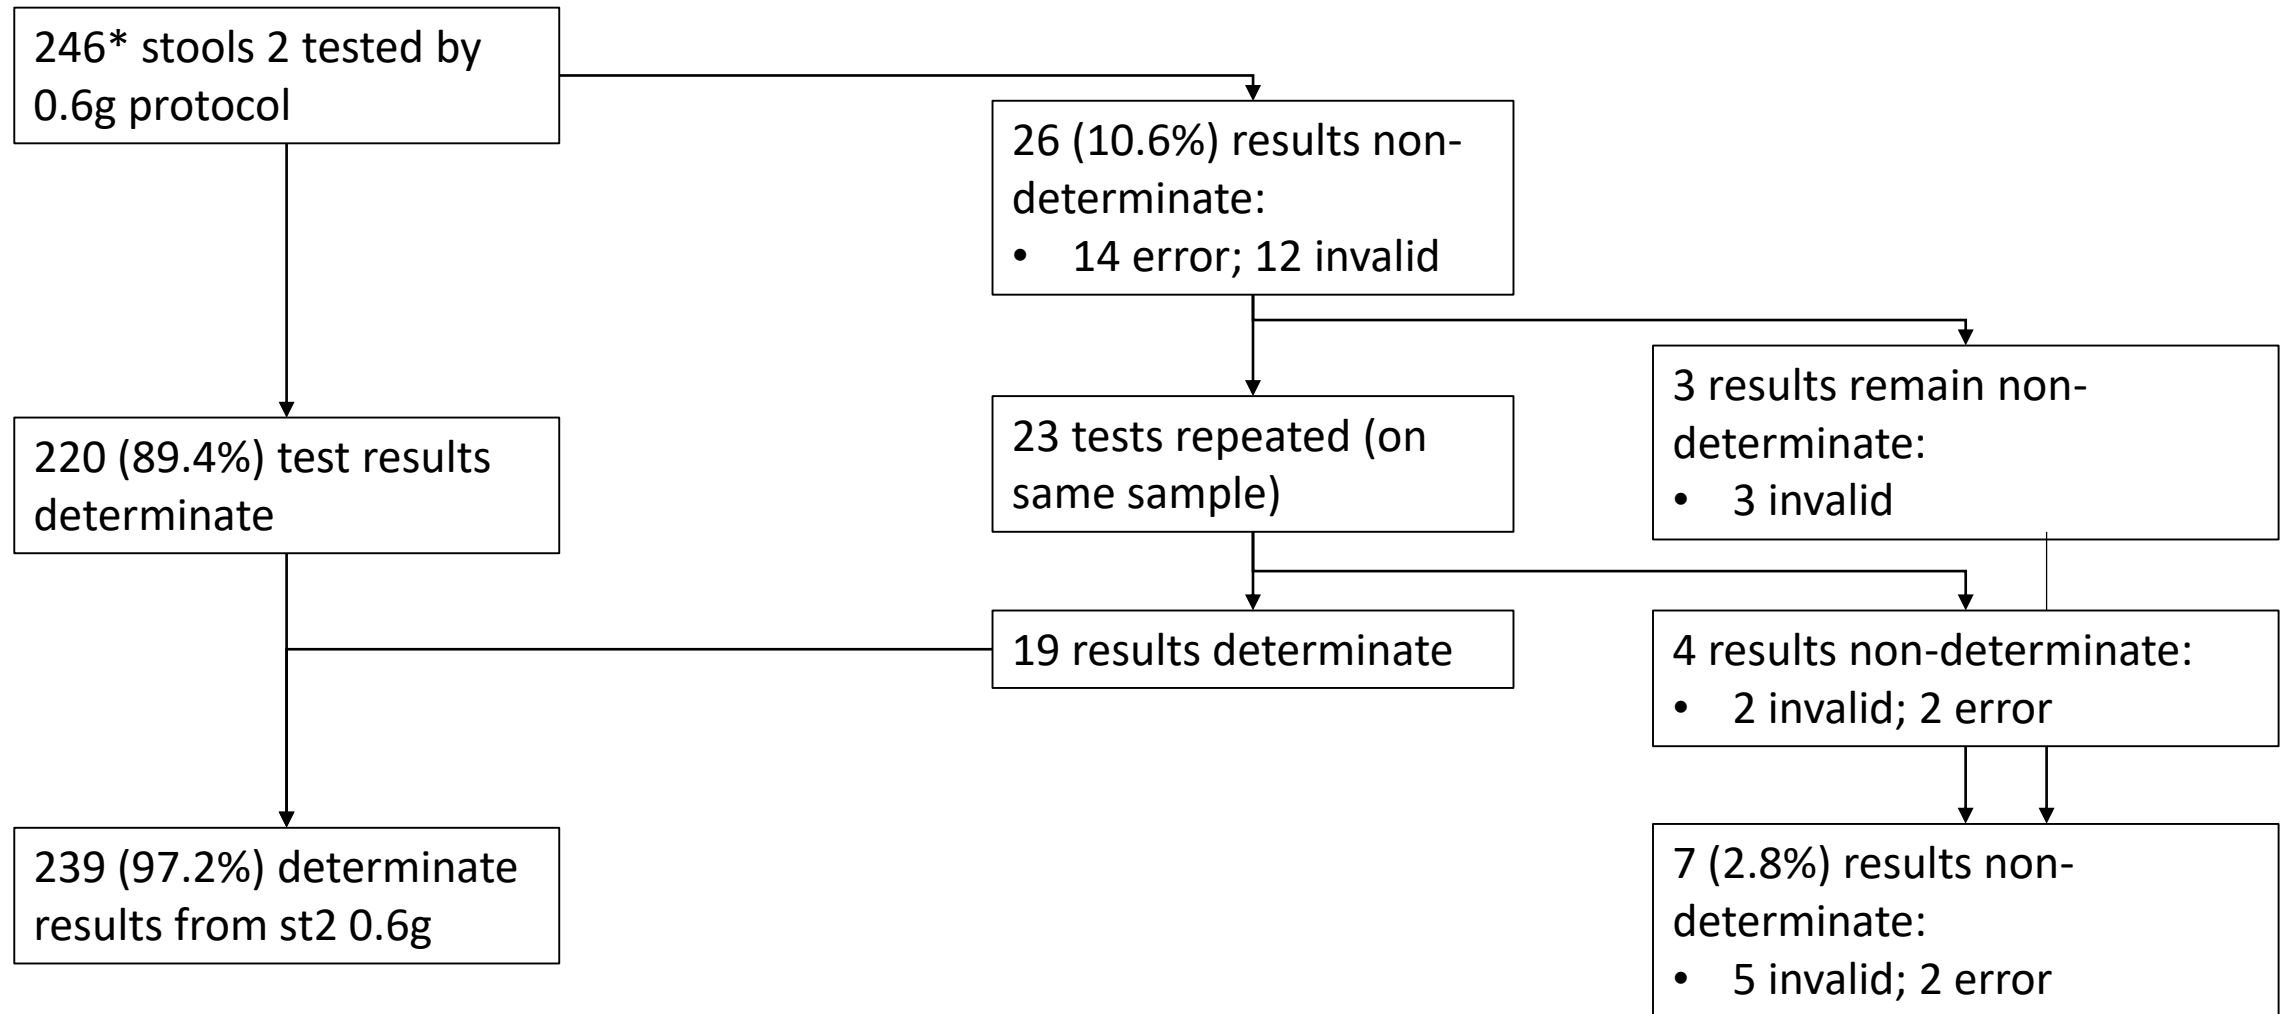

\*249 collected; 1 only tested by swab and 2 collected >7 days after first respiratory specimen so excluded

Figure S2b. Flow diagram showing stool 2 specimens (1 stool per child) finally included in the Xpert-S analysis

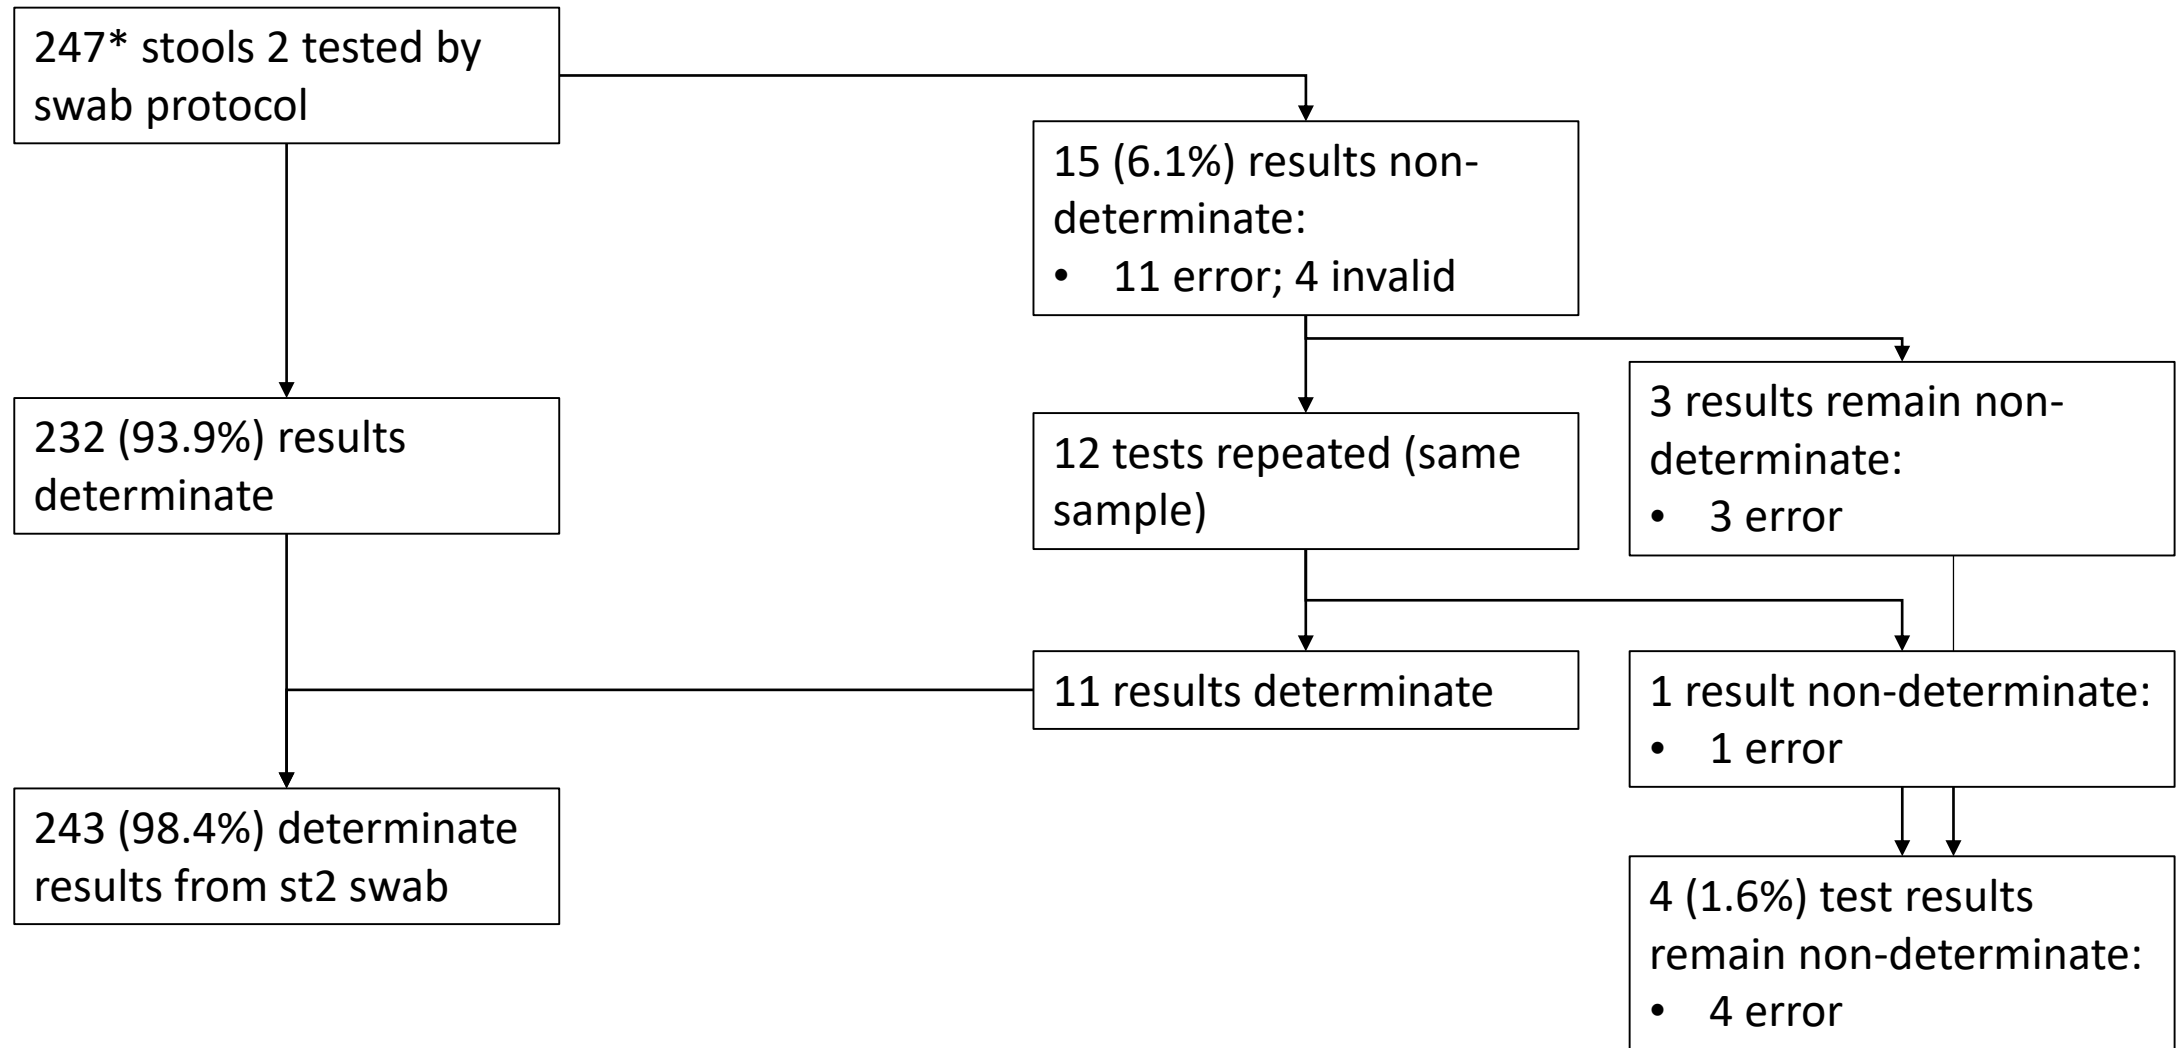

\*249 collected; 2 collected >7 days after first respiratory specimen so excluded

Table S1. The diagnostic value of a single stool specimen tested by 0.6g and swab protocol (per participant analysis)

| Stool Xpert method      | Reference standard                            |                               |                                 |                                                 |                               |                                  |
|-------------------------|-----------------------------------------------|-------------------------------|---------------------------------|-------------------------------------------------|-------------------------------|----------------------------------|
|                         | Xpert on 1 <sup>st</sup> respiratory specimen |                               |                                 | Culture on 1 <sup>st</sup> respiratory specimen |                               |                                  |
| 0.6g                    | Site 1 [n=130]                                | Site 2 [n=129]                | Both sites [n=259]*             | Site 1 [n=120]                                  | Site 2 [n=120]                | Both sites [n=240]**             |
| Sensitivity (%; 95% CI) | 1/1;<br>(100; 2.5-100.0)                      | 3/8;<br>(37.5; 8.5-75.5)      | 4/9;<br>(44.4; 13.7-78.8)       | 1/1;<br>(100; 2.5-100)                          | 3/15;<br>(20; 4.3-48.1)       | 4/16;<br>(25.0; 7.3- 52.4)       |
| Specificity (%; 95% CI) | 127/129;<br>(98.4; 94.5-99.8)                 | 121/121;<br>(100; 97.0-100)   | 248/250;<br>(99.2; 97.1- 99.9)  | 117/119;<br>(98.3; 94.1-99.8)                   | 105/105;<br>(100; 96.5-100)   | 222/224;<br>(99.1; 96.8- 99.9)   |
| PPV (%; 95% CI)         | 1/3;<br>(33.3; 0.84-90.6)                     | 3/3;<br>(100; 29.2-100)       | 4/6;<br>(66.7; 22.3- 95.7)      | 1/3;<br>(33.3; 0.84-90.6)                       | 3/3;<br>(100; 29.2-100)       | 4/6;<br>(66.7; 22.3- 95.7)       |
| NPV (%; 95% CI)         | 127/127;<br>(100; 97.1-100)                   | 121/126;<br>(96.0; 91.0-98.7) | 248/253;<br>(98.0; 95.4- 99.4)  | 117/117;<br>(100; 96.9-100)                     | 105/117;<br>(89.8; 82.8-94.6) | 222/234;<br>(94.9; 91.2-97.3)    |
| Swab                    | Site 1 [n=131]                                | Site 2 [n=128]                | Both sites [n=259] <sup>§</sup> | Site 1 [n=117]                                  | Site 2 [n=119]                | Both sites [n=236] <sup>§§</sup> |
| Sensitivity (%; 95% CI) | 0/1;<br>(0; 0.0-97.5)                         | 4/8;<br>(50.0; 15.7-84.3)     | 4/9;<br>(44.4; 13.7-78.8)       | 0/1;<br>(0; 0-97.5)                             | 4/15;<br>(26.7; 7.8-55.1)     | 4/16;<br>(25.0; 7.3- 52.4)       |
| Specificity (%; 95% CI) | 130/130;<br>(100; 97.2-100)                   | 119/120;<br>(99.2; 95.4-100)  | 249/250;<br>(99.6; 97.8- 100)   | 116/116;<br>(100; 96.9-100)                     | 103/104;<br>(99.0; 94.8-100)  | 219/220;<br>(99.5; 97.5- 100)    |
| PPV (%; 95% CI)         | -                                             | 4/5;<br>(80.0; 28.4-99.5)     | 4/5;<br>(80.0; 28.4- 99.5)      | -                                               | 4/5;<br>(80.0; 28.4-99.5)     | 4/5;<br>(80.0; 28.4-99.5)        |
| NPV (%; 95% CI)         | 130/131;<br>(99.2; 95.8-100)                  | 119/123;<br>(96.7; 91.9-99.1) | 249/254;<br>(98.0; 95.5-99.4)   | 116/117;<br>(99.1; 95.3-100)                    | 103/114;<br>(90.4; 83.4-95.1) | 219/231;<br>(94.8; 91.1-97.3)    |

PPV: positive predictive value; CI: confidence interval; NPV: negative predictive value; \*1 child with only swab method on stool 1; 11 children with non-determinate stool Xpert results and 9 with non-determinate respiratory Xpert results were excluded; \*\*1 child with only swab method on stool 1; 11 children with non-determinate stool Xpert result; 2 with no respiratory culture done and 26 with contaminated or lost respiratory cultures were excluded; <sup>§</sup>1 child with only 0.6g method on stool 1; 12 children with non-determinate stool Xpert results and 8 with non-determinate respiratory Xpert results were excluded; <sup>§§</sup>1 child with only 0.6g method on stool 1; 12 children with non-determinate stool Xpert results, 2 with no respiratory culture done and 29 with contaminated or lost respiratory cultures were excluded.

Table S2. The combined diagnostic value of stool 1 and 2

| Stool Xpert method      | Reference standard                            |                               |                                 |                                                 |                               |                                  |
|-------------------------|-----------------------------------------------|-------------------------------|---------------------------------|-------------------------------------------------|-------------------------------|----------------------------------|
|                         | Xpert on 1 <sup>st</sup> respiratory specimen |                               |                                 | Culture on 1 <sup>st</sup> respiratory specimen |                               |                                  |
| 0.6g                    | Site 1 [n=137]                                | Site 2 [n=130]                | Both sites [n=267]*             | Site 1 [n=123]                                  | Site 2 [n=121]                | Both sites[n=244]**              |
| Sensitivity (%; 95% CI) | 1/1;<br>(100; 2.5-100.0)                      | 6/9;<br>(66.7; 29.9-92.5)     | 7/10;<br>(70.0; 34.8-93.3)      | 1/1;<br>(100; 2.5-100.0)                        | 6/16;<br>(37.5; 15.2-64.6)    | 7/17;<br>(41.2; 18.4- 67.1)      |
| Specificity (%; 95% CI) | 132/136;<br>(97.1; 92.6-99.2)                 | 121/121;<br>(100; 97.0-100)   | 253/257;<br>(98.4; 96.1- 99.6)  | 118/122;<br>(96.7; 91.8-99.1)                   | 105/105;<br>(100; 96.5-100)   | 223/227;<br>(98.2; 95.5- 99.5)   |
| PPV (%; 95% CI)         | 1/5;<br>(20.0; 0.5-71.6)                      | 6/6;<br>(100; 54.1-100)       | 7/11;<br>(63.6; 30.8-89.1)      | 1/5;<br>(20.0; 0.5-71.6)                        | 6/6;<br>(100; 54.1-100)       | 7/11;<br>(63.6; 30.8-89.1)       |
| NPV (%; 95% CI)         | 132/132;<br>(100; 97.2-100)                   | 121/124;<br>(97.6; 93.1-99.5) | 253/256;<br>(98.8; 96.6-99.8)   | 118/118;<br>(100; 96.9-100)                     | 105/115;<br>(91.3; 84.6-85.8) | 223/233;<br>(95.7; 92.2-97.9)    |
| Swab                    | Site 1 [n=139]                                | Site 2 [n=131]                | Both sites [n=270] <sup>§</sup> | Site 1 [n=125]                                  | Site 2 [n=128]                | Both sites [n=247] <sup>§§</sup> |
| Sensitivity (%; 95% CI) | 0/1;<br>(0; 0.0-97.5)                         | 5/9;<br>(55.6; 21.2-86.3)     | 5/10;<br>(50.0; 18.7-81.3)      | 0/1;<br>(0; 0.0-97.5)                           | 6/16;<br>(37.5; 15.2-64.6)    | 6/17;<br>(35.3; 14.2- 61.7)      |
| Specificity (%; 95% CI) | 138/138;<br>(100; 97.4-100)                   | 120/122;<br>(98.4; 94.2-99.8) | 258/260;<br>(99.2; 97.2-99.9)   | 124/124;<br>(100; 97.1-100)                     | 105/106;<br>(99.1; 94.9-100)  | 229/230;<br>(99.6; 97.6- 100)    |
| PPV (%; 95% CI)         | -                                             | 5/7;<br>(71.4; 29.0-96.3)     | 5/7;<br>(71.4; 29.0-96.3)       | -                                               | 6/7;<br>(85.7; 42.1-99.6)     | 6/7;<br>(85.7; 42.1-99.6)        |
| NPV (%; 95% CI)         | 138/139;<br>(99.3; 96.1-100)                  | 120/124;<br>(96.8; 91.9-99.1) | 258/263;<br>(98.1; 95.6-99.4)   | 124/125;<br>(99.2; 95.6-100)                    | 105/115;<br>(91.3; 84.6-95.8) | 229/240;<br>(95.2; 91.6-97.6)    |

PPV: positive predictive value; CI: confidence interval; NPV: negative predictive value; \*1 child with only swab method on stool 1; 3 children with non-determinate stool Xpert results and 9 with non-determinate respiratory Xpert results were excluded; \*\*1 child with only swab method on stool 1; 3 children with non-determinate stool Xpert result; 3 with no respiratory culture done and 29 with contaminated or lost respiratory cultures were excluded; <sup>§</sup> 1 child with non-determinate stool Xpert results and 9 with non-determinate respiratory Xpert results were excluded; <sup>§§</sup>1 child with non-determinate stool Xpert results, 3 with no respiratory culture done and 29 with contaminated or lost respiratory cultures were excluded.

Table S3. Cycle threshold (Ct) values for Xpert-positive stool results for the 2 children with rifampicin resistance detected on respiratory specimens who were also stool-positive, but with indeterminate rifampicin results

| Sample ID    | Test Result                                            | SPC  | Probe E | Probe D | Probe B | Probe C | Probe A | min rpoB Ct | deltaCt_max |
|--------------|--------------------------------------------------------|------|---------|---------|---------|---------|---------|-------------|-------------|
| 096_ST1_0.6g | MTB DETECTED VERY LOW;<br>Rif Resistance INDETERMINATE | 24.7 | 0       | 32.5    | 32.2    | 33      | 33.2    | 32.2        | -32.2       |
| 096_ST2_0.6g | MTB DETECTED VERY LOW;<br>Rif Resistance INDETERMINATE | 24.6 | 0       | 32.8    | 32.1    | 33.2    | 32.9    | 32.1        | -32.1       |
| 391_ST2_0.6g | MTB DETECTED VERY LOW;<br>Rif Resistance INDETERMINATE | 22.5 | 37.6    | 35.4    | 34.8    | 35.3    | 35.7    | 34.8        | 2.8         |

*ST1: stool specimen 1; ST2: stool specimen 2; SPC: sample processing control*

Table S4. All stool results for the 14 children who had *M. tuberculosis complex* detected on stool Xpert.

| PID | Final S1 Xp 06 res | Final S1 Xp 06 semiq | Final S1 Xp 06 rif res | Final S1 Xp Sw res | Final S1 Xp Sw rif res | Final S1 Xp Sw rif res | Final S2 Xp 06 res | Final S2 Xp 06 semiq | Final S2 Xp 06 rif res | Final S2 Xp Sw res | Final S2 Xp Sw semiq | Final S2 Xp Sw rif res | Summary results for respiratory specimens                                                                                                               |
|-----|--------------------|----------------------|------------------------|--------------------|------------------------|------------------------|--------------------|----------------------|------------------------|--------------------|----------------------|------------------------|---------------------------------------------------------------------------------------------------------------------------------------------------------|
| 51  | POS                | VL                   | ND                     | NEG                | .                      | .                      | NEG                |                      |                        | NEG                |                      |                        | Only 1 resp specimen: neg by Xpert and culture                                                                                                          |
| 83  | NEG                |                      |                        | NEG                |                        |                        | POS                | VL                   | ND                     | NEG                |                      |                        | Only 1 resp specimen: neg by Xpert and culture                                                                                                          |
| 96  | POS                | VL                   | IND                    | NEG                |                        |                        | POS                | VL                   | IND                    | NEG                |                      |                        | Only 1 resp specimen: pos by Xpert (rif detected); pos by culture (rif and inh resistant on LPA)                                                        |
| 145 | NEG                |                      |                        | I/E                |                        |                        | POS                | VL                   | IND                    | NEG                |                      |                        | 2 resp specimens: both neg by Xpert and culture                                                                                                         |
| 152 | POS                | VL                   | IND                    | NEG                |                        |                        | NEG                |                      |                        | NEG                |                      |                        | 2 resp specimens: one neg; one pos by Xpert (rif not detected) and pos by culture (rif and inh susceptible on LPA)                                      |
| 366 | NEG                |                      |                        | NEG                |                        |                        | NEG                |                      |                        | POS                | VL                   | IND                    | 4 resp specimens: one pos by Xpert (rif not detected); two pos by culture (rif and inh susceptible on LPA)                                              |
| 372 | NEG                |                      |                        | NEG                |                        |                        | POS                | VL                   | ND                     | NEG                |                      |                        | 4 resp specimens: 4 pos by Xpert (rif not detected); one pos by culture (rif and inh susceptible on LPA)                                                |
| 374 | POS                | VL                   | ND                     | POS                | L                      | ND                     | POS                | L                    | ND                     | POS                | L                    | ND                     | 4 resp specimens: all pos by Xpert (rif not detected) and by culture (rif and inh susceptible on LPA)                                                   |
| 391 | NEG                |                      |                        | NEG                |                        |                        | POS                | VL                   | IND                    | NEG                |                      |                        | 4 resp specimens: all pos by Xpert (rif not detected in 3; rif detected and deemed false positive in 1) and by culture (rif and inh susceptible on LPA) |
| 394 | I/E                |                      |                        | I/E                |                        |                        | POS                | L                    | ND                     | POS                | L                    | ND                     | 4 resp specimens: all pos by Xpert (rif not detected) and by culture (rif and inh susceptible on LPA)                                                   |
| 458 | POS                | L                    | ND                     | POS                | L                      | ND                     | POS                | L                    | ND                     | POS                | L                    | ND                     | 3 resp specimens: all pos by Xpert (rif not detected) and by culture (rif and inh susceptible on LPA)                                                   |
| 497 | NEG                |                      |                        | POS                | VL                     | ND                     | NEG                |                      |                        | NEG                |                      |                        | 4 resp specimens: one pos by Xpert (rif not detected) and pos by culture (rif and inh susceptible on LPA)                                               |
| 502 | NEG                |                      |                        | POS                | VL                     | ND                     | NEG                |                      |                        | NEG                |                      |                        | 4 resp specimens: two pos by Xpert (rif not detected) and pos by culture (rif and inh susceptible on LPA)                                               |
| 503 | POS                | L                    | ND                     | POS                | L                      | ND                     | POS                | L                    | ND                     | POS                | L                    | ND                     | 4 resp specimens: one pos by Xpert (rif not detected); two pos by culture (rif and inh susceptible on LPA)                                              |



## (Footnotes for Table S2)

*PID: participant identifier; S1: first stool specimen; Xp 06: Xpert 0.6g protocol; res: result; rif: rifampicin resistance result; semiq: semiquantitative Xpert result; Xp Sw: Xpert swab protocol; POS: positive; NEG: negative; resp: respiratory; VL: very low; ND: not detected; IND: indeterminate; inh: isoniazid; LPA: line-probe assay (MTBDRPlus); I/E: invalid or error result; L: low.*

Table S5. Xpert positivity by different stool consistencies (per sample analysis)

| Stool consistency | Stool Xpert positive* |                 | Total        |
|-------------------|-----------------------|-----------------|--------------|
|                   | No (%)<br>n=398       | Yes (%)<br>n=14 | (%)<br>n=412 |
| Liquid            | 38 (9.5)              | 0               | 38 (9.2)     |
| Sticky            | 51 (12.8)             | 4 (28.6)        | 55 (13.3)    |
| Semi-solid        | 206 (51.8)            | 8 (57.1)        | 214 (51.9)   |
| Solid             | 103 (25.9)            | 2 (14.3)        | 105 (25.5)   |

*\*Includes any stool test on swab or 0.6g, from stool 1 and stool 2 if stool 2 was a different specimen from stool 1 (i.e. excludes second stool tests done on stool 1)*
